# Supplementary material
Source: ML conference proceedings conference paper supplement (https://proceedings.neurips.cc/paper_files/paper/2012/hash/1bf2efbbe0c49b9f567c2e40f645279a-Abstract.html)
Supplement: Supplementary file 1 [file 1bf2efbbe0c49b9f567c2e40f645279a-Supplemental.zip]

## A Appendix

The problem in Equation (2) is a convex optimization problem. It can be rewritten as

$$\underset{\alpha}{\text{minimize}} \quad \max \left\{ \frac{a_1}{b_1 + \alpha}, \dots, \frac{a_n}{b_n + \alpha} \right\} + \lambda \alpha, \quad \text{subject to } \alpha > 0. \quad (\text{A.1})$$

Equation (A.1) is a convex optimization problem because the first term of the objective function is the sum of a pointwise maximum of convex functions,  $a_i/(b_i + \alpha)$ , which is convex in  $\alpha$ .

**Theorem 1.** *The sequence  $\{f(\mathbf{x}^j)\}_{j=1,2,\dots}$  provided by Equation (7) converges to the local maximum of the density field.*

*Proof.*  $f(\mathbf{x})$  shown in Equation (3) is a bounded function because it is the sum of finite bounded kernel density functions. To prove the theorem, it is sufficient to show that the sequence  $\{f(\mathbf{x}^j)\}_{j=1,2,\dots}$  is strictly monotonically increasing, i.e.,  $f(\mathbf{x}^j) < f(\mathbf{x}^{j+1})$ , if  $\mathbf{x}^j \neq \mathbf{x}^{j+1}$ .

From Equation (3),

$$f(\mathbf{x}^{j+1}) - f(\mathbf{x}^j) = \frac{c}{N} \sum_{i=1}^N \frac{1}{h_i} \left( k \left( \frac{\|\mathbf{d}(\mathbf{l}_i, \mathbf{x}^{j+1})\|^2}{h_i^2} \right) - k \left( \frac{\|\mathbf{d}(\mathbf{l}_i, \mathbf{x}^j)\|^2}{h_i^2} \right) \right). \quad (\text{A.2})$$

If a function,  $\phi(z)$ , is convex, the following inequality holds:

$$\phi(z_2) - \phi(z_1) \geq \phi'(z_1)(z_2 - z_1), \quad (\text{A.3})$$

where  $\phi'$  is the derivative of  $\phi$ .

The profile,  $k(z)$ , of the Gaussian kernel density function is convex and it satisfies Equation (A.3):

$$k(z_2) - k(z_1) \geq k'(z_1)(z_2 - z_1). \quad (\text{A.4})$$

$\|\mathbf{z}\|^2$  is a convex function in  $\mathbf{z}$  where  $\mathbf{z}$  is a vector and thus,

$$\|\mathbf{z}_2\|^2 - \|\mathbf{z}_1\|^2 \geq 2\mathbf{z}_1^\top (\mathbf{z}_2 - \mathbf{z}_1). \quad (\text{A.5})$$

The perspective distance vector function,  $\mathbf{d}(\mathbf{l}_i, \mathbf{z})$ , is also convex in  $\mathbf{z}$  because it is a linear-fractional function [1, 2] which preserves the convexity and thus,

$$\mathbf{d}(\mathbf{l}_i, \mathbf{z}_2) - \mathbf{d}(\mathbf{l}_i, \mathbf{z}_1) \geq \nabla_{\mathbf{z}}(\mathbf{d}(\mathbf{l}_i, \mathbf{z}_1)) (\mathbf{z}_2 - \mathbf{z}_1). \quad (\text{A.6})$$

From Equation (A.5) and (A.6), the following inequality holds:

$$\begin{aligned} \|\mathbf{d}(\mathbf{l}_i, \mathbf{x}^{j+1})\|^2 - \|\mathbf{d}(\mathbf{l}_i, \mathbf{x}^j)\|^2 &\geq 2\mathbf{d}(\mathbf{l}_i, \mathbf{x}^j)^\top (\mathbf{d}(\mathbf{l}_i, \mathbf{x}^{j+1}) - \mathbf{d}(\mathbf{l}_i, \mathbf{x}^j)) \\ &\geq 2\mathbf{d}(\mathbf{l}_i, \mathbf{x}^j)^\top ((\nabla_{\mathbf{x}} \mathbf{d}(\mathbf{l}_i, \mathbf{x}^j)) (\mathbf{x}^{j+1} - \mathbf{x}^j)). \end{aligned} \quad (\text{A.7})$$

Equation (A.2) can be rewritten as,

$$f(\mathbf{x}^{j+1}) - f(\mathbf{x}^j) \geq \frac{c}{N} \sum_{i=1}^N \frac{1}{h_i^3} k' \left( \left\| \frac{\mathbf{d}(\mathbf{l}_i, \mathbf{x}^j)}{h} \right\|^2 \right) \left[ \|\mathbf{d}(\mathbf{l}_i, \mathbf{x}^{j+1})\|^2 - \|\mathbf{d}(\mathbf{l}_i, \mathbf{x}^j)\|^2 \right] \quad \text{by Inequality (A.4)} \quad (\text{A.8})$$

$$\geq \frac{2c}{N} \sum_{i=1}^N \frac{1}{h_i^3} k' \left( \left\| \frac{\mathbf{d}(\mathbf{l}_i, \mathbf{x}^j)}{h} \right\|^2 \right) \mathbf{d}(\mathbf{l}_i, \mathbf{x}^j)^\top (\nabla_{\mathbf{x}} \mathbf{d}(\mathbf{l}_i, \mathbf{x}^j)) (\mathbf{x}^{j+1} - \mathbf{x}^j) \quad \text{by Inequality (A.7)} \quad (\text{A.9})$$

$$= \frac{2c}{N} \sum_{i=1}^N w_i^j (\tilde{\mathbf{x}}_i^j - \mathbf{x}^j)^\top (\mathbf{x}^{j+1} - \mathbf{x}^j) \quad \text{by Equation (5)} \quad (\text{A.10})$$

$$= \frac{2c}{N} \left[ \left( \sum_{i=1}^N w_i^j (\tilde{\mathbf{x}}_i^j)^\top \right) \mathbf{x}^{j+1} - \left( \sum_{i=1}^N w_i^j (\tilde{\mathbf{x}}_i^j)^\top \right) \mathbf{x}^j \right] \quad (\text{A.11})$$

$$- \sum_{i=1}^N w_i^j (\mathbf{x}^j)^\top \mathbf{x}^{j+1} + \sum_{i=1}^N w_i^j (\mathbf{x}^j)^\top \mathbf{x}^j \quad \text{by expansion} \quad (\text{A.12})$$

$$= \frac{2c}{N} \sum_{i=1}^N w_i^j \left( \|\mathbf{x}^{j+1}\|^2 - 2 (\mathbf{x}^{j+1})^\top \mathbf{x}^j + \|\mathbf{x}^j\|^2 \right) \quad \text{because } \sum_{i=1}^N w_i^j \mathbf{x}^{j+1} = \sum_{i=1}^N w_i^j \tilde{\mathbf{x}}_i^j \text{ from Equation (6)} \quad (\text{A.13})$$

$$= \frac{2c}{N} \|\mathbf{x}^{j+1} - \mathbf{x}^j\|^2 \sum_{i=1}^N w_i^j. \quad (\text{A.14})$$

Since the profile,  $k(x)$ , is monotonically decreasing,  $k'(x) < 0$ . This leads the weight  $w_i^j$  to be strictly positive. As a result, the right hand side of Inequality (A.14) is strictly positive if  $\mathbf{x}^j \neq \mathbf{x}^{j+1}$ . Thus,  $f(\mathbf{x}^{j+1}) - f(\mathbf{x}^j) > 0$ .  $\square$

## References

- [1] H. Hindi. A tutorial on convex optimization. In *American Control Conference*, 2004.
- [2] S. Boyd and L. Vandenberghe. *Convex Optimization*. Cambridge University Press, 2004.
