# Supplementary material
Source: ML conference proceedings conference paper supplement (https://proceedings.neurips.cc/paper_files/paper/2012/hash/1bf2efbbe0c49b9f567c2e40f645279a-Abstract.html)
Supplement: Supplementary file 2 [file 1bf2efbbe0c49b9f567c2e40f645279a-Supplemental.zip]

Archive with 1 entries (1 files):
- supplementary/Paper 212/NIPS12_supp.pdf
